# Supplementary material
Source: PubMed Central journal article supplement (PMC2769564)

# Figure S1

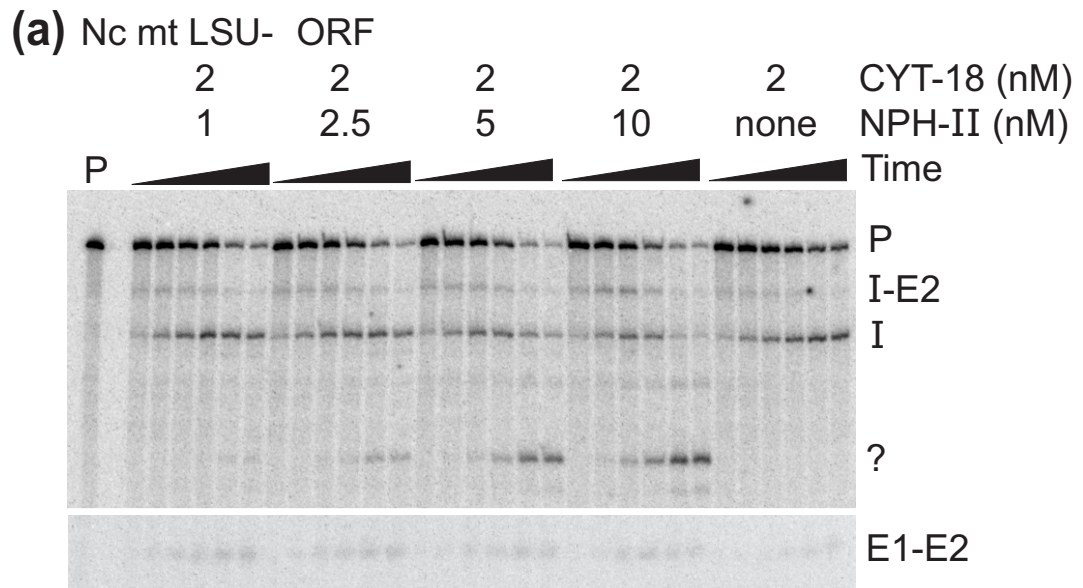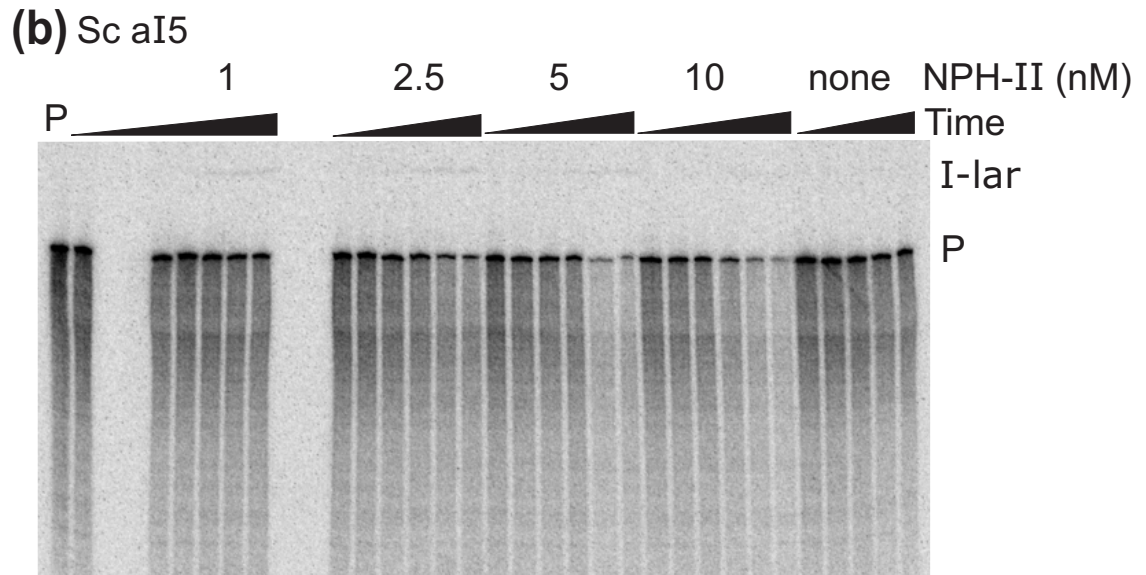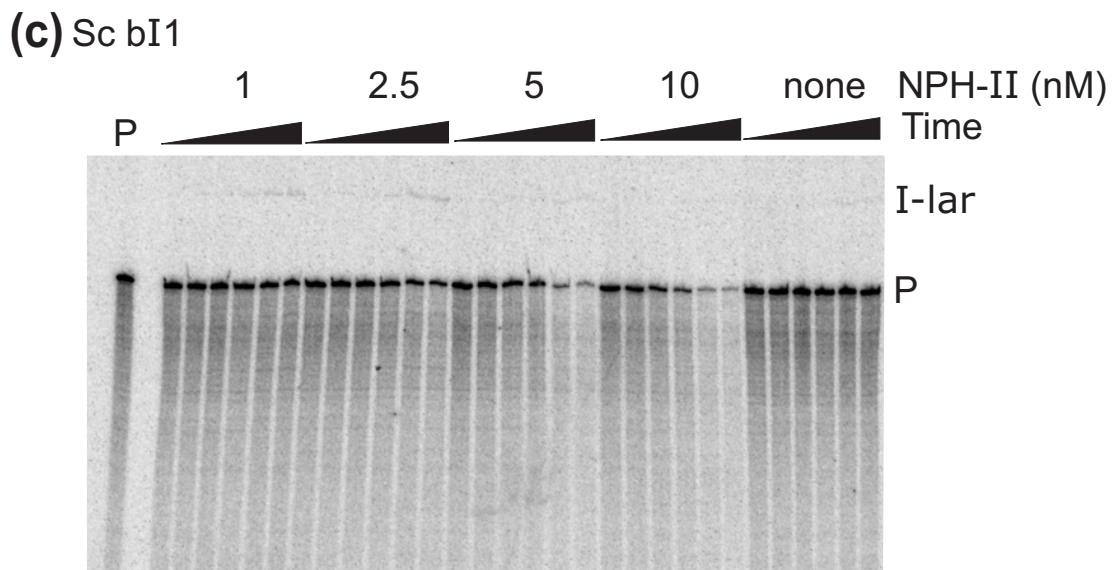

Supplement: NIHMS114067-supplement-01.pdf [file NIHMS114067-supplement-01.pdf]

# Figure S2

## (a) Nc mt LSU- ORF

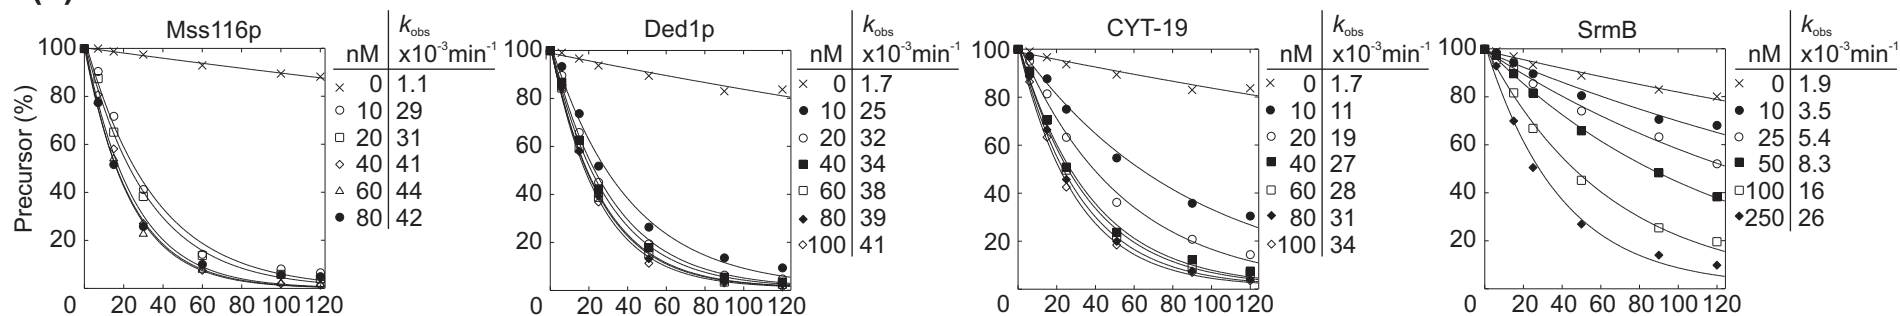

## (b) Sc aI5

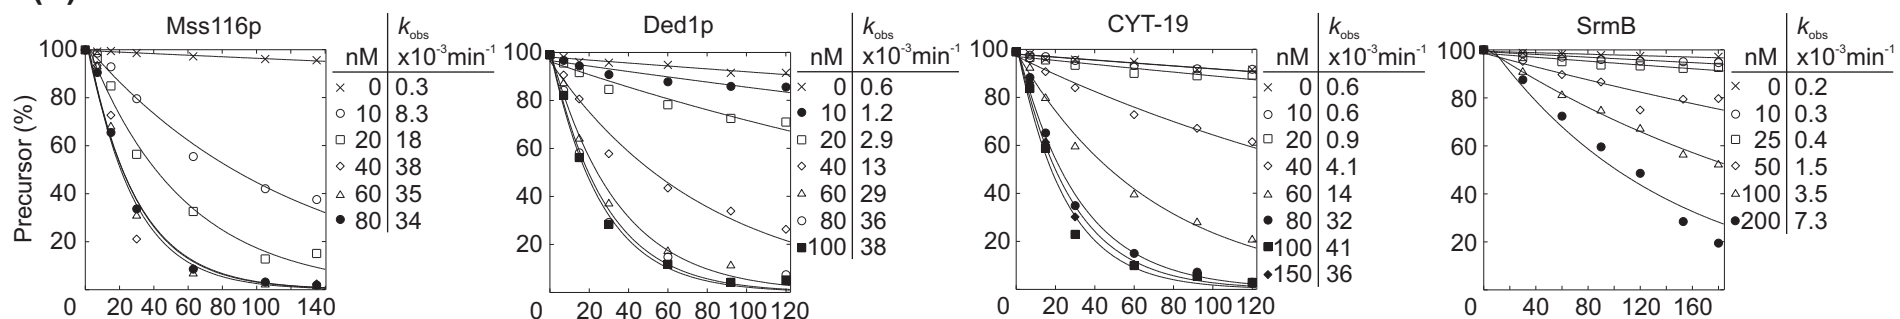

## (c) Sc bI1

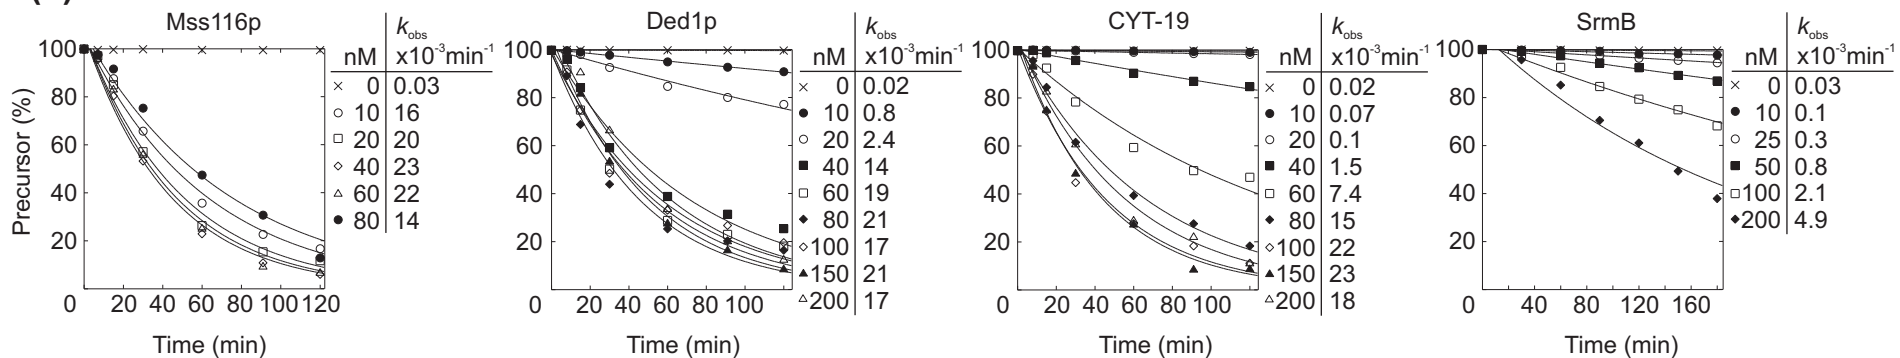

Supplement: NIHMS114067-supplement-02.pdf [file NIHMS114067-supplement-02.pdf]

# Figure S3

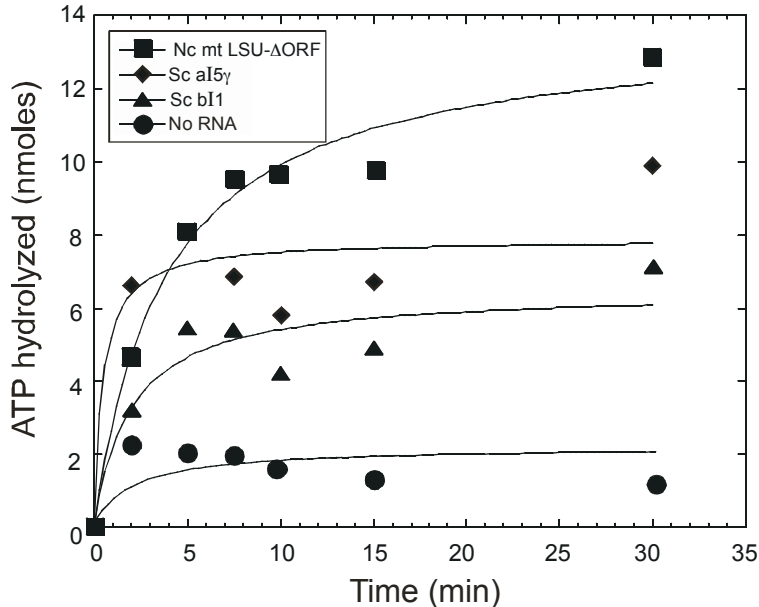

Supplement: NIHMS114067-supplement-03.pdf [file NIHMS114067-supplement-03.pdf]

# Figure S4

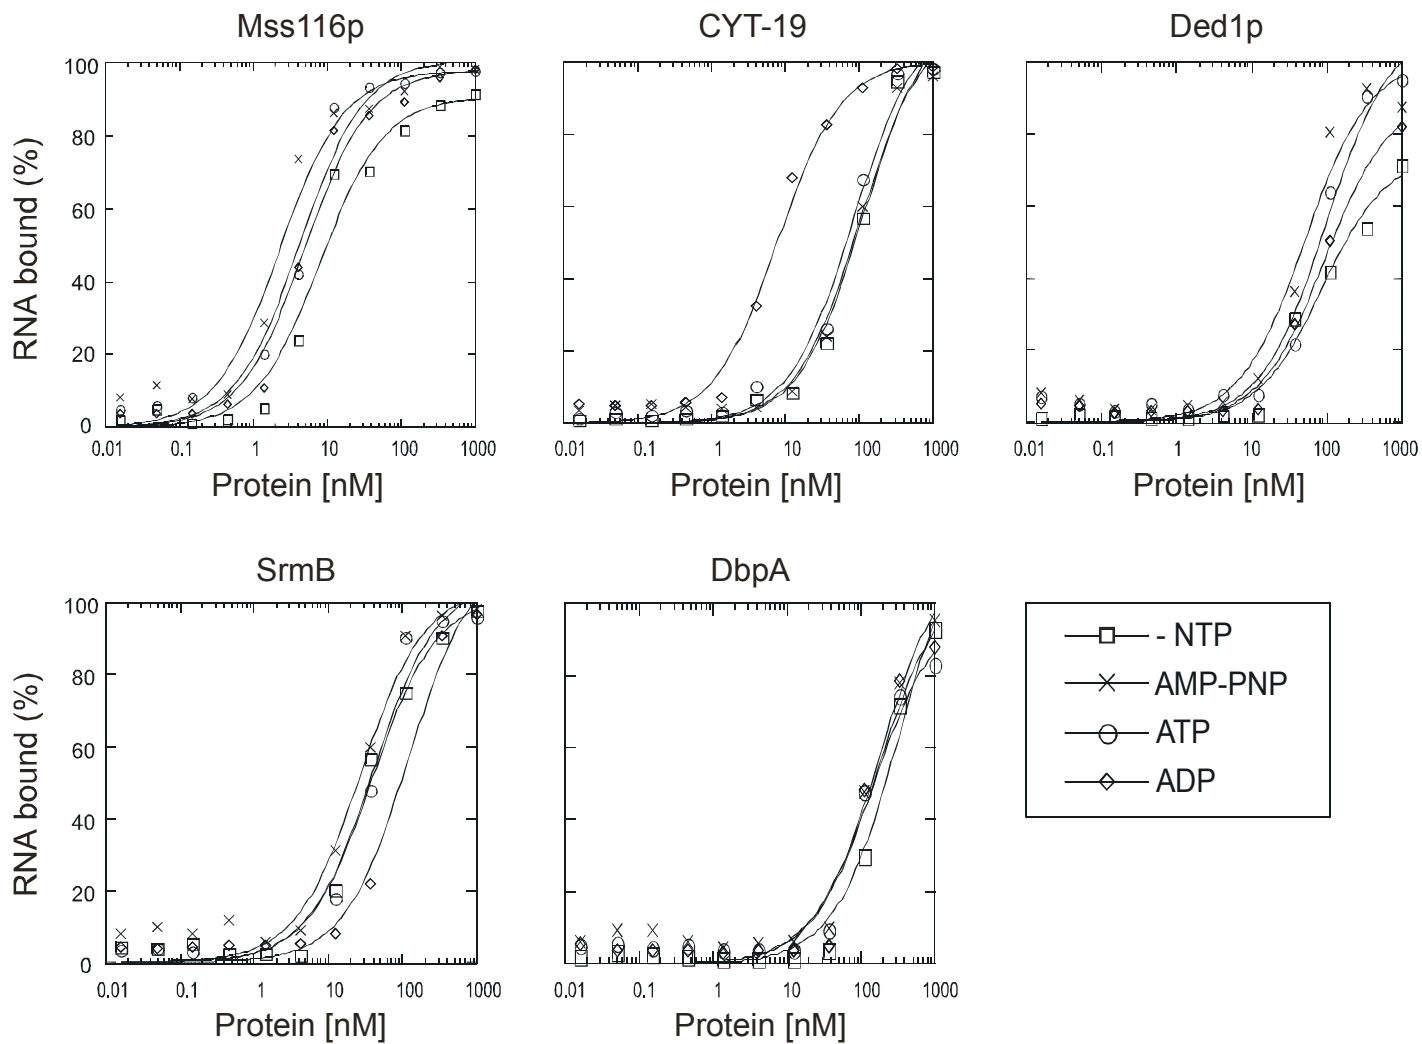

Supplement: NIHMS114067-supplement-04.pdf [file NIHMS114067-supplement-04.pdf]
